# Supplementary material for: Bio-Preservative Potential of Microorganisms Isolated from Red Grape against Food Contaminant Fungi
Source: MDPI journal article supplement (doi:10.3390/toxins13060412), 2021-06-10
Supplement: s1 [file s1]

# Supplementary Materials: Bio-Preservative Potential of Microorganisms Isolated from Red Grape Against Food Contaminant Fungi

Victor Dopazo, Carlos Luz, Jordi Mañes, Juan Manuel Quiles, Raquel Carbonell, Jorge Calpe and Giuseppe Meca

**Table S1.** Identification and quantification of the main VOC present in the CFS. Results as a percentage (%) of the VOC by dividing the area of each peak by the total area of the chromatogram peaks. Statistically significant differences for each fermentation are indicated with different letters ( $p < 0.05$ ). nd = not detected

| VOCs                                         | Samples                     |                              |                              |                              |                            |                              |                              |                            |                               |                              |
|----------------------------------------------|-----------------------------|------------------------------|------------------------------|------------------------------|----------------------------|------------------------------|------------------------------|----------------------------|-------------------------------|------------------------------|
|                                              | MRS                         | UTA1                         | UTA2                         | UTA3                         | UTA4                       | UTA5                         | UTA6                         | UTA7                       | UTA8                          | UTA9                         |
| <b>ALCOHOLS</b>                              | 37.8 ± 3.1 <sup>a</sup>     | 16.6 ± 1.8 <sup>ab</sup>     | 13.3 ± 2.2 <sup>bcde</sup>   | 13.0 ± 0.6 <sup>bcde</sup>   | 8.7 ± 2.1 <sup>fg</sup>    | 12.3 ± 3.1 <sup>cdef</sup>   | 16.1 ± 0.6 <sup>abc</sup>    | 4.3 ± 0.4 <sup>ijk</sup>   | 8.4 ± 1.1 <sup>fgh</sup>      | 3.7 ± 0.1 <sup>ikl</sup>     |
| Ethanol                                      | nd                          | 11.1 ± 0.3                   | 8.4 ± 1.8                    | 9.8 ± 0.1                    | 8.7 ± 2.1                  | 12.3 ± 3.1                   | 12.9 ± 0.3                   | 3.3 ± 0.3                  | 8.4 ± 1.1                     | nd                           |
| 2-Ethyl-1-hexanol                            | 37.8 ± 3.1                  | 5.4 ± 1.5                    | 4.9 ± 0.4                    | 3.2 ± 0.5                    | nd                         | nd                           | 3.2 ± 0.3                    | 1.0 ± 0.1                  | nd                            | 3.7 ± 0.1                    |
| <b>ALDHEYDES</b>                             | 27.8 ± 1.0 <sup>bcd</sup>   | 24.9 ± 5.0 <sup>bcdefg</sup> | 15.8 ± 3.4 <sup>hij</sup>    | 19.3 ± 1.7 <sup>efghij</sup> | 12.7 ± 1.1 <sup>j</sup>    | 17.7 ± 0.4 <sup>efghij</sup> | 14.1 ± 2.9 <sup>ij</sup>     | 17.3 ± 1.3 <sup>ghij</sup> | 21.2 ± 2.3 <sup>d efghi</sup> | 23.6 ± 1.2 <sup>cdefgh</sup> |
| 3-Methylbutanal                              | nd                          | 7.8 ± 1.8                    | 4.0 ± 0.9                    | 5.1 ± 1.1                    | nd                         | nd                           | nd                           | 9.7 ± 0.7                  | 4.8 ± 0.4                     | 6.5 ± 0.0                    |
| Benzaldehyde                                 | 13.0 ± 0.8                  | 3.6 ± 1.7                    | 2.8 ± 0.2                    | 4.0 ± 0.4                    | 4.2 ± 0.8                  | 3.8 ± 0.1                    | 5.5 ± 0.5                    | 1.8 ± 0.2                  | 5.2 ± 0.4                     | 4.7 ± 0.7                    |
| Benzeneacetaldehyde                          | nd                          | 12.6 ± 0.7                   | 7.6 ± 1.5                    | 8.4 ± 0.1                    | 8.5 ± 0.3                  | 12.5 ± 0.2                   | 8.5 ± 2.4                    | 5.7 ± 0.4                  | 11.3 ± 1.5                    | 12.5 ± 0.5                   |
| 3-Methylbenzaldehyde                         | 14.8 ± 0.3                  | 0.8 ± 0.8                    | 1.4 ± 0.7                    | 1.8 ± 0.2                    | nd                         | 1.5 ± 0.1                    | nd                           | nd                         | nd                            | nd                           |
| <b>PYRAZINES</b>                             | nd                          | 19.5 ± 6.4 <sup>fg</sup>     | 27.9 ± 1.2 <sup>bcdefg</sup> | 26.9 ± 2.3 <sup>cdefg</sup>  | 32.8 ± 1.3 <sup>abcd</sup> | 30.1 ± 2.7 <sup>bcde</sup>   | 30.9 ± 5.4 <sup>abcd</sup>   | 10.0 ± 0.7 <sup>h</sup>    | 20.2 ± 3.6 <sup>fg</sup>      | 35.2 ± 2.1 <sup>abc</sup>    |
| 2,5-Dimethylpyrazine                         | nd                          | 11.2 ± 2.9                   | 18.6 ± 0.4                   | 14.2 ± 0.1                   | 21.3 ± 0.2                 | 14.1 ± 0.5                   | 15.6 ± 1.4                   | 5.4 ± 0.1                  | 10.6 ± 1.9                    | 22.1 ± 0.3                   |
| 2-Ethyl-6-methylpyrazine                     | nd                          | nd                           | 1.2 ± 0.2                    | 2.3 ± 0.3                    | 3.9 ± 0.4                  | 3.1 ± 0.4                    | 2.1 ± 0.8                    | nd                         | nd                            | 3.9 ± 1.4                    |
| Trimethylpyrazine                            | nd                          | nd                           | 0.4 ± 0.1                    | 0.3 ± 0.1                    | 0.8 ± 0.3                  | 0.5 ± 0.1                    | 0.4 ± 0.0                    | nd                         | nd                            | nd                           |
| 2-ethyl-3-methyl-Pyrazine                    | nd                          | nd                           | nd                           | 0.2 ± 0.1                    | nd                         | nd                           | nd                           | nd                         | nd                            | nd                           |
| 2-ethenyl-6-methyl-Pyrazine                  | nd                          | 0.6 ± 0.1                    | 0.4 ± 0.2                    | 0.4 ± 0.0                    | 0.3 ± 0.1                  | 0.7 ± 0.3                    | 0.7 ± 0.2                    | nd                         | nd                            | nd                           |
| 3-Ethyl-2,5-dimethylpyrazine                 | nd                          | 5.7 ± 2.1                    | 5.6 ± 0.2                    | 6.5 ± 0.8                    | 4.6 ± 0.2                  | 7.6 ± 0.5                    | 8.1 ± 2.0                    | 3.1 ± 0.4                  | 6.7 ± 0.6                     | 7.2 ± 0.2                    |
| 2,6-diethyl-Pyrazine                         | nd                          | 0.3 ± 0.0                    | nd                           | nd                           | 0.8 ± 0.0                  | nd                           | nd                           | nd                         | nd                            | nd                           |
| 2-ethyl-3,5-dimethyl-Pyrazine                | nd                          | 0.1 ± 0.0                    | 0.3 ± 0.1                    | 0.9 ± 0.4                    | nd                         | 0.8 ± 0.2                    | nd                           | nd                         | nd                            | nd                           |
| 2,5-Dimethyl-3-isopentylpyrazine             | nd                          | 1.6 ± 1.2                    | 1.4 ± 0.0                    | 2.1 ± 0.5                    | 1.1 ± 0.1                  | 3.3 ± 0.7                    | 4.0 ± 0.9                    | 1.6 ± 0.2                  | 2.8 ± 1.1                     | 2.0 ± 0.1                    |
| <b>OTHERS</b>                                | 34.5 ± 0.7 <sup>defgh</sup> | 39.0 ± 0.8 <sup>bcdefg</sup> | 43.0 ± 4.3 <sup>bcde</sup>   | 40.7 ± 3.8 <sup>bcdef</sup>  | 45.8 ± 4.1 <sup>bcd</sup>  | 40.0 ± 3.2 <sup>bcdefg</sup> | 38.9 ± 2.8 <sup>bcdefg</sup> | 68.4 ± 1.6 <sup>a</sup>    | 50.2 ± 3.7 <sup>b</sup>       | 37.4 ± 3.2 <sup>cdefgh</sup> |
| Acetic acid                                  | 7.1 ± 0.3                   | 27.5 ± 0.1                   | 33.1 ± 2.1                   | 27.5 ± 0.8                   | 22.8 ± 1.0                 | 23 ± 0.4                     | 28.2 ± 0.7                   | 65.3 ± 0.9                 | 42.5 ± 2.8                    | 28.0 ± 1.6                   |
| Ethyl acetate                                | nd                          | 9.8 ± 0.2                    | 5.8 ± 0.9                    | 7.4 ± 0.9                    | 18.2 ± 1.2                 | 9.9 ± 1.0                    | 5.6 ± 1.5                    | 2.4 ± 0.7                  | 7.7 ± 0.8                     | 5.6 ± 1.2                    |
| Dimethyl trisulfide                          | nd                          | nd                           | nd                           | 1.3 ± 0.2                    | 1.0 ± 0.4                  | 1.7 ± 0.5                    | 1.3 ± 0.3                    | nd                         | nd                            | 2.5 ± 0.4                    |
| 2,3,5-trimethyl-Hexane                       | nd                          | nd                           | 2.0 ± 0.4                    | 1.8 ± 0.3                    | 1.8 ± 0.4                  | 1.7 ± 0.1                    | 2.2 ± 0.1                    | 0.6 ± 0.0                  | nd                            | nd                           |
| 1,3-Di-tert-butylbenzene                     | nd                          | 1.2 ± 0.2                    | 0.8 ± 0.5                    | 1.5 ± 0.2                    | 1.3 ± 0.6                  | 1.9 ± 0.0                    | 1.7 ± 0.2                    | nd                         | nd                            | 1.3 ± 0.1                    |
| 2,4-Di-tert-butylphenol                      | 27.4 ± 0.4                  | nd                           | nd                           | nd                           | nd                         | nd                           | nd                           | nd                         | nd                            | nd                           |
| (2,4-ditert-butylphenyl) 5-hydroxypentanoate | nd                          | 0.3 ± 0.3                    | nd                           | nd                           | nd                         | 0.8 ± 0.1                    | nd                           | nd                         | nd                            | nd                           |

|                                              |                              |                            |                            |                              |                              |                              |                            |                             |                             |                           |
|----------------------------------------------|------------------------------|----------------------------|----------------------------|------------------------------|------------------------------|------------------------------|----------------------------|-----------------------------|-----------------------------|---------------------------|
| 1,5-Diphenyl-2H-1,2,4-triazoline-3-thione    | nd                           | nd                         | 1.3 ± 0.4                  | 1.3 ± 1.3                    | 0.7 ± 0.5                    | 1.0 ± 1.1                    | nd                         | nd                          | nd                          | nd                        |
| <b>VOCs</b>                                  | <b>Samples</b>               |                            |                            |                              |                              |                              |                            |                             |                             |                           |
|                                              | <b>UTA10</b>                 | <b>UTA11</b>               | <b>UTA12</b>               | <b>UTA13</b>                 | <b>UTA14</b>                 | <b>UTA15</b>                 | <b>UTA16</b>               | <b>UTA17</b>                | <b>UTA18</b>                | <b>UTA19</b>              |
| <b>ALCOHOLS</b>                              | 10.4 ± 1.9 <sup>defgh</sup>  | 8.6 ± 1.8 <sup>fgh</sup>   | 6.5 ± 0.2 <sup>hijk</sup>  | 17.8 ± 1.2 <sup>a</sup>      | 9.5 ± 0.1 <sup>efgh</sup>    | 16.3 ± 1.8 <sup>abc</sup>    | 6.6 ± 0.1 <sup>hijk</sup>  | 7.4 ± 0.5 <sup>ghij</sup>   | 7.5 ± 0.1 <sup>ghijk</sup>  | 3.7 ± 0.4 <sup>ijkl</sup> |
| Ethanol                                      | 7.8 ± 1.4                    | 7.2 ± 1.8                  | nd                         | 10.3 ± 0.7                   | nd                           | nd                           | 6.6 ± 0.1                  | 6.0 ± 0.3                   | 7.5 ± 0.1                   | 3.7 ± 0.4                 |
| 3-methyl-1-Butanol                           | nd                           | nd                         | 6.5 ± 0.2                  | 7.5 ± 0.5                    | 9.5 ± 0.1                    | 9.7 ± 1.7                    | nd                         | nd                          | nd                          | nd                        |
| 2-methyl-1-Butanol                           | nd                           | nd                         | nd                         | nd                           | nd                           | nd                           | nd                         | nd                          | nd                          | nd                        |
| 2-Ethyl-1-hexanol                            | 2.5 ± 0.6                    | nd                         | nd                         | nd                           | nd                           | 6.6 ± 0.1                    | nd                         | 1.5 ± 0.2                   | nd                          | nd                        |
| <b>ALDHEYDES</b>                             | 20.9 ± 0.9 <sup>defghi</sup> | 23 ± 2.9 <sup>cdefgh</sup> | 29.8 ± 3.7 <sup>bcd</sup>  | 25.2 ± 2.4 <sup>bcdefg</sup> | 32.7 ± 2.1 <sup>b</sup>      | 23.9 ± 4.0 <sup>bcdefg</sup> | 41.2 ± 1.1 <sup>a</sup>    | 27.6 ± 1.6 <sup>bcde</sup>  | 25.9 ± 0.8 <sup>bcdef</sup> | 30.5 ± 3.8 <sup>bc</sup>  |
| 3-Methylbutanal                              | 8.0 ± 0.3                    | 7.4 ± 0.8                  | 8.5 ± 1.2                  | 8.9 ± 1.2                    | 11.9 ± 1.6                   | 8.1 ± 1.7                    | 8.6 ± 0.2                  | 4.9 ± 0.2                   | 9.2 ± 0.7                   | 11.9 ± 2.4                |
| Benzaldehyde                                 | 3.3 ± 0.3                    | 2.8 ± 0.3                  | 4 ± 1.3                    | 3.3 ± 0.0                    | 3.0 ± 0.1                    | 3.6 ± 0.4                    | 5.9 ± 0.2                  | 3.7 ± 0.2                   | 3.9 ± 0                     | 4.6 ± 1.0                 |
| Benzeneacetaldehyde                          | 9.7 ± 0.3                    | 11.1 ± 1.5                 | 14.7 ± 1.0                 | 13 ± 1.2                     | 17.8 ± 0.4                   | 12.1 ± 1.9                   | 16.6 ± 0.4                 | 13.8 ± 1.1                  | 12.8 ± 0.1                  | 14 ± 0.4                  |
| 3-Methylbenzaldehyde                         | nd                           | 1.7 ± 0.3                  | 2.6 ± 0.2                  | nd                           | nd                           | nd                           | 5.2 ± 0.2                  | 3.5 ± 0.1                   | nd                          | nd                        |
| 5-Methyl-2-phenyl-2-hexenal                  | nd                           | nd                         | nd                         | nd                           | nd                           | nd                           | 4.8 ± 0.1                  | 1.8 ± 0.1                   | nd                          | nd                        |
| <b>PYRAZINES</b>                             | 26.1 ± 1.5 <sup>cdefg</sup>  | 19.1 ± 1.5 <sup>gh</sup>   | 20.8 ± 2.7 <sup>efg</sup>  | 27.9 ± 4.4 <sup>bcdefg</sup> | 27.7 ± 1.5 <sup>bcdefg</sup> | 21.6 ± 1.8 <sup>efg</sup>    | 23.9 ± 0.8 <sup>defg</sup> | 30.1 ± 1 <sup>bcde</sup>    | 34.8 ± 0.9 <sup>abc</sup>   | 40.3 ± 4.2 <sup>a</sup>   |
| 2,5-Dimethylpyrazine                         | 17.4 ± 1.1                   | 12.9 ± 0.6                 | 14.3 ± 1.3                 | 16.1 ± 1.8                   | 20.8 ± 0.6                   | 17.6 ± 0.9                   | 8.5 ± 0.2                  | 14.1 ± 0.5                  | 16.5 ± 0.5                  | 22.6 ± 2.4                |
| 2-Ethyl-6-methylpyrazine                     | 1.9 ± 0.2                    | 1.1 ± 0.2                  | nd                         | 7.0 ± 1.0                    | nd                           | nd                           | nd                         | 3.5 ± 0.1                   | nd                          | nd                        |
| 3-Ethyl-2,5-dimethylpyrazine                 | 5.0 ± 0.0                    | 2.9 ± 0.4                  | 4.4 ± 0.7                  | 3.0 ± 1.0                    | 4.7 ± 0.7                    | 2.7 ± 0.5                    | 6.3 ± 0.2                  | 7.2 ± 0.2                   | 12 ± 0.1                    | 10.3 ± 1.2                |
| 2,6-diethyl-Pyrazine                         | nd                           | 0.6 ± 0.0                  | nd                         | nd                           | nd                           | nd                           | nd                         | nd                          | nd                          | nd                        |
| 2-ethyl-3,5-dimethyl-Pyrazine                | nd                           | nd                         | nd                         | nd                           | nd                           | nd                           | nd                         | nd                          | nd                          | 2.4 ± 0.4                 |
| 2,6-Dimethyl-3(2-methyl-1-butyl)pyrazine     | nd                           | nd                         | nd                         | nd                           | nd                           | nd                           | 0.9 ± 0.0                  | 0.6 ± 0.1                   | 0.8 ± 0                     | 0.7 ± 0.2                 |
| 2,5-Dimethyl-3-isopentylpyrazine             | 1.9 ± 0.1                    | 1.6 ± 0.3                  | 2.2 ± 0.6                  | 1.9 ± 0.6                    | 2.2 ± 0.1                    | 1.3 ± 0.4                    | 8.3 ± 0.4                  | 4.7 ± 0.2                   | 5.5 ± 0.3                   | 4.3 ± 0.1                 |
| <b>OTHERS</b>                                | 42.6 ± 4.0 <sup>bcde</sup>   | 49.3 ± 2.9 <sup>bcd</sup>  | 42.9 ± 6.2 <sup>bcde</sup> | 29.1 ± 2.0 <sup>fgh</sup>    | 30.1 ± 3.1 <sup>fgh</sup>    | 38.2 ± 3.3 <sup>bcdefg</sup> | 28.4 ± 0.9 <sup>gh</sup>   | 34.9 ± 0.9 <sup>defgh</sup> | 31.8 ± 0.9 <sup>efgh</sup>  | 25.5 ± 4.1 <sup>h</sup>   |
| Acetic acid                                  | 28.4 ± 2.0                   | 21.6 ± 0.7                 | 23.3 ± 1.9                 | 18.3 ± 0.9                   | 20.0 ± 2.1                   | 26.2 ± 2.1                   | 12.9 ± 0.3                 | 17.5 ± 0.2                  | 21.9 ± 0.6                  | 13.4 ± 2.3                |
| Ethyl acetate                                | 9.6 ± 1.0                    | 4.9 ± 0.0                  | nd                         | 3.2 ± 0.1                    | nd                           | 3.9 ± 0.7                    | nd                         | 3.8 ± 0.1                   | nd                          | nd                        |
| 1,1-dimethyl- Cyclopropane                   | nd                           | 10.3 ± 0.7                 | nd                         | nd                           | nd                           | nd                           | nd                         | nd                          | nd                          | nd                        |
| Dimethyl trisulfide                          | 2.3 ± 0.2                    | 5.1 ± 0.6                  | 8.1 ± 1.7                  | 5.6 ± 0.6                    | 7.6 ± 0.5                    | 6.2 ± 0.2                    | 3.0 ± 0.0                  | 4.7 ± 0.4                   | 4.0 ± 0.2                   | 4.5 ± 0.6                 |
| 4-ethyl-Decane                               | nd                           | nd                         | nd                         | nd                           | nd                           | nd                           | nd                         | nd                          | nd                          | 2.1 ± 0.5                 |
| Ethanone, 1-(1H-pyrrol-2-yl)-                | nd                           | 1.6 ± 0.2                  | 2.3 ± 0.5                  | 0.8 ± 0.1                    | 1.0 ± 0.5                    | 2.0 ± 0.3                    | 3.6 ± 0.1                  | 3.5 ± 0.2                   | nd                          | nd                        |
| 3,6-dimethyl-Decane                          | nd                           | nd                         | nd                         | nd                           | nd                           | nd                           | nd                         | nd                          | nd                          | 2.0 ± 0.3                 |
| 2,3,5-trimethyl-Hexane                       | nd                           | 1.4 ± 0.0                  | 2.6 ± 0.6                  | nd                           | nd                           | nd                           | nd                         | nd                          | nd                          | nd                        |
| 1,3-Di-tert-butylbenzene                     | nd                           | 2.6 ± 0.1                  | 4.7 ± 0.8                  | nd                           | nd                           | nd                           | 3.9 ± 0.1                  | 2.1 ± 0.1                   | 3.8 ± 0.1                   | nd                        |
| 2,4-Di-tert-butylphenol                      | nd                           | nd                         | nd                         | nd                           | nd                           | nd                           | 5.0 ± 0.4                  | 3.3 ± 0.0                   | 2.0 ± 0.0                   | 3.5 ± 0.4                 |
| (2,4-ditert-butylphenyl) 5-hydroxypentanoate | 0.9 ± 0.5                    | 0.7 ± 0.1                  | nd                         | nd                           | nd                           | nd                           | nd                         | nd                          | nd                          | nd                        |
| 1,5-Diphenyl-2H-1,2,4-triazoline-3-thione    | 1.4 ± 0.3                    | 1.1 ± 0.4                  | 1.9 ± 0.5                  | 1.2 ± 0.2                    | 1.6 ± 0.1                    | nd                           | nd                         | nd                          | nd                          | nd                        |
| <b>VOCs</b>                                  | <b>Samples</b>               |                            |                            |                              |                              |                              |                            |                             |                             |                           |
|                                              | <b>UTA20</b>                 | <b>UB5</b>                 | <b>UB6</b>                 | <b>UB7</b>                   | <b>UB8</b>                   | <b>UBC1</b>                  | <b>UTC6</b>                | <b>UT5</b>                  | <b>VBC9</b>                 |                           |
| <b>ALCOHOLS</b>                              | 9.4 ± 0.9 <sup>efgh</sup>    | 3.6 ± 0.2 <sup>kl</sup>    | 4.2 ± 0.9 <sup>jk</sup>    | 3.2 ± 0.2 <sup>kl</sup>      | 11 ± 2.2 <sup>fgh</sup>      | nd                           | 13.6 ± 0.9 <sup>jk</sup>   | nd                          | 9.9 ± 1.4 <sup>abcd</sup>   |                           |

|                                          |                             |                              |                            |                             |                              |                              |                              |                              |                             |
|------------------------------------------|-----------------------------|------------------------------|----------------------------|-----------------------------|------------------------------|------------------------------|------------------------------|------------------------------|-----------------------------|
| Ethanol                                  | 4.1 ± 0.6                   | nd                           | nd                         | nd                          | 6.0 ± 1.1                    | nd                           | 8.8 ± 0.2                    | nd                           | 3.4 ± 0.4                   |
| 3-methyl-1-Butanol                       | 5.2 ± 0.3                   | 3.6 ± 0.2                    | nd                         | nd                          | 5.0 ± 1.1                    | nd                           | 4.8 ± 0.7                    | nd                           | 3.9 ± 0.9                   |
| 2-methyl-1-Butanol                       | nd                          | nd                           | nd                         | nd                          | nd                           | nd                           | nd                           | nd                           | 2.7 ± 0.2                   |
| 2-Ethyl-1-hexanol                        | nd                          | nd                           | 4.2 ± 0.9                  | 3.2 ± 0.2                   | nd                           | nd                           | nd                           | nd                           | nd                          |
| <b>ALDHEYDES</b>                         | 26.1 ± 1.9 <sup>bcdef</sup> | 26.6 ± 1.4 <sup>bcdef</sup>  | 31.0 ± 0.9 <sup>bc</sup>   | 26.5 ± 3.8 <sup>bcdef</sup> | 19.4 ± 2.4 <sup>defghi</sup> | 31.2 ± 2.5 <sup>bc</sup>     | 24.0 ± 2.1 <sup>bcdefg</sup> | 24.5 ± 3.9 <sup>bcdefg</sup> | 29 ± 3.2 <sup>bcd</sup>     |
| 3-Methylbutanal                          | 5.9 ± 0.1                   | 6.7 ± 0.4                    | 18.5 ± 0.5                 | 9.7 ± 0.8                   | nd                           | 8.5 ± 0.7                    | 4.2 ± 0.9                    | 6.2 ± 1.6                    | 4.1 ± 0.3                   |
| 2-Methylbutanal                          | nd                          | nd                           | nd                         | nd                          | nd                           | nd                           | nd                           | nd                           | 1.9 ± 0.1                   |
| Benzaldehyde                             | 4.6 ± 0.4                   | 2.0 ± 0.0                    | nd                         | nd                          | 5.2 ± 0.4                    | nd                           | 3.2 ± 0.0                    | nd                           | 4.2 ± 0.6                   |
| Benzeneacetaldehyde                      | 15.6 ± 1.3                  | 8.5 ± 0.2                    | 7.3 ± 0.3                  | 16.8 ± 2.9                  | 9.6 ± 0.5                    | 9.9 ± 0.2                    | 9.2 ± 0.2                    | 7.6 ± 0.5                    | 10.8 ± 0.7                  |
| 3-Methylbenzaldehyde                     | nd                          | 9.4 ± 0.8                    | 5.2 ± 0.0                  | nd                          | 4.7 ± 1.4                    | 12.8 ± 1.5                   | 4.5 ± 0.1                    | 10.7 ± 1.8                   | 4.6 ± 0.6                   |
| 5-Methyl-2-phenyl-2-hexenal              | nd                          | nd                           | nd                         | nd                          | nd                           | nd                           | 2.9 ± 0.9                    | nd                           | nd                          |
| <b>PYRAZINES</b>                         | 36.8 ± 2.8 <sup>ab</sup>    | 33.0 ± 1.6 <sup>abcd</sup>   | 31.5 ± 3.2 <sup>abcd</sup> | 19.8 ± 1.1 <sup>fg</sup>    | 20.6 ± 1.1 <sup>efg</sup>    | 29.2 ± 5.3 <sup>bcdef</sup>  | 19.3 ± 1.1 <sup>gh</sup>     | 31.6 ± 3.3 <sup>abcd</sup>   | 24.9 ± 3.5 <sup>defg</sup>  |
| 2,5-Dimethylpyrazine                     | 22.7 ± 0.6                  | 20.2 ± 0.6                   | 31.5 ± 3.2                 | 16.8 ± 1.0                  | 12.6 ± 0.6                   | 23.7 ± 3.7                   | 7.9 ± 0.1                    | 17.6 ± 0.6                   | 10.1 ± 0.9                  |
| 2-Ethyl-6-methylpyrazine                 | nd                          | 3.3 ± 0.4                    | nd                         | nd                          | nd                           | 4.2 ± 1                      | nd                           | 3.3 ± 0.8                    | nd                          |
| Trimethylpyrazine                        | nd                          | 1.8 ± 0.1                    | nd                         | nd                          | nd                           | nd                           | nd                           | nd                           | nd                          |
| 3-Ethyl-2,5-dimethylpyrazine             | 7.2 ± 1.4                   | 2.3 ± 0.3                    | nd                         | 1.8 ± 0.1                   | 4.5 ± 0.3                    | nd                           | 3.4 ± 0.5                    | 3.5 ± 0.7                    | 4.6 ± 0.1                   |
| 2,6-diethyl-Pyrazine                     | nd                          | nd                           | nd                         | nd                          | nd                           | nd                           | 2.2 ± 0.3                    | nd                           | nd                          |
| 2-ethyl-3,5-dimethyl-Pyrazine            | nd                          | nd                           | nd                         | nd                          | nd                           | nd                           | nd                           | nd                           | 3.1 ± 1.6                   |
| 2-Isoamyl-6-methylpyrazine               | nd                          | 1.5 ± 0.1                    | nd                         | nd                          | nd                           | nd                           | nd                           | nd                           | nd                          |
| 2,6-Dimethyl-3(2-methyl-1-butyl)pyrazine | 0.7 ± 0.2                   | 0.8 ± 0.0                    | nd                         | nd                          | 0.4 ± 0.0                    | 1.3 ± 0.7                    | nd                           | 1.3 ± 0.7                    | 0.8 ± 0.1                   |
| 2,5-Dimethyl-3-isopentylpyrazine         | 6.3 ± 0.6                   | nd                           | nd                         | 1.2 ± 0.0                   | 3.1 ± 0.1                    | nd                           | 5.8 ± 0.3                    | 3.5 ± 0.2                    | 6.2 ± 0.8                   |
| 2-butyl-3,5-dimethyl-Pyrazine            | nd                          | 3.2 ± 0.1                    | nd                         | nd                          | nd                           | nd                           | nd                           | 2.5 ± 0.3                    | nd                          |
| <b>OTHERS</b>                            | 27.8 ± 3.3 <sup>gh</sup>    | 36.8 ± 2.4 <sup>cdefgh</sup> | 33.4 ± 2.9 <sup>efgh</sup> | 50.5 ± 3.9 <sup>b</sup>     | 49 ± 5.9 <sup>bc</sup>       | 39.5 ± 2.6 <sup>bcdefg</sup> | 43.1 ± 3.1 <sup>bcde</sup>   | 44 ± 3.7 <sup>bcde</sup>     | 36.2 ± 4.2 <sup>defgh</sup> |
| Acetic acid                              | 13.2 ± 0.9                  | 8 ± 0.4                      | 8.9 ± 0.7                  | 25.1 ± 0.8                  | 21.8 ± 1.4                   | 5.1 ± 1.0                    | 14.3 ± 0.3                   | 5.5 ± 0.9                    | 11.0 ± 1.5                  |
| Ethyl acetate                            | 5.1 ± 1.3                   | nd                           | nd                         | 5.4 ± 0.1                   | 8.1 ± 1.5                    | nd                           | 6.5 ± 1.4                    | nd                           | 3.3 ± 0.2                   |
| 1,1-dimethyl- Cyclopropane               | nd                          | nd                           | nd                         | 12.4 ± 0.7                  | nd                           | nd                           | nd                           | nd                           | nd                          |
| Dimethyl trisulfide                      | 3.6 ± 0.9                   | 2.6 ± 0.0                    | nd                         | 7.7 ± 2.3                   | 5.7 ± 1.5                    | nd                           | 2.3 ± 0.2                    | nd                           | 2.7 ± 0.2                   |
| 4-ethyl-Decane                           | nd                          | nd                           | nd                         | nd                          | 2 ± 0.3                      | nd                           | 2.3 ± 0.2                    | nd                           | 2.3 ± 0.3                   |
| Ethanone, 1-(1H-pyrrol-2-yl)-            | nd                          | 3.3 ± 0.0                    | nd                         | nd                          | 4.6 ± 0.1                    | nd                           | 3.5 ± 0.1                    | nd                           | 2.5 ± 0.3                   |
| 3,6-dimethyl-Decane                      | nd                          | nd                           | nd                         | nd                          | 1.8 ± 0.1                    | nd                           | 2.6 ± 0.1                    | nd                           | 1.4 ± 0.2                   |
| 5-methyl-Undecane                        | nd                          | nd                           | nd                         | nd                          | nd                           | nd                           | nd                           | nd                           | 5.0 ± 0.4                   |
| 1,3-Di-tert-butylbenzene                 | 5.9 ± 0.1                   | 21.1 ± 1.9                   | 24.5 ± 2.2                 | nd                          | 1.9 ± 0                      | 34.4 ± 1.6                   | 7.0 ± 0.2                    | 38.5 ± 2.9                   | 5.1 ± 0.5                   |
| 2,4-Di-tert-butylphenol                  | nd                          | 1.7 ± 0.1                    | nd                         | nd                          | 2.0 ± 0.7                    | nd                           | 2.3 ± 0.1                    | nd                           | 2.7 ± 0.6                   |

|                                                   |    |    |    |    |    |    |           |    |    |
|---------------------------------------------------|----|----|----|----|----|----|-----------|----|----|
| 1,5-Diphenyl-2H-<br>1,2,4-triazoline-3-<br>thione | nd | nd | nd | nd | nd | nd | 2.4 ± 0.4 | nd | nd |
|---------------------------------------------------|----|----|----|----|----|----|-----------|----|----|
